# Supplementary material
Source: Springer Nature journal article supplement (https://www.springermedizin.de/resource/supplementary/12887_2005_86_MOESM4_ESM.pdf/9477230)

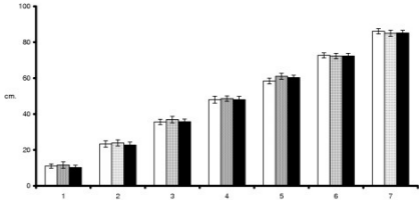

Supplement: MOESM4 [file 9477230]
